# Supplementary material
Source: HighWire-hosted journal article supplement (http://d2538ggaoe6cji.cloudfront.net/highwire/filestream/34380/field_highwire_adjunct_files/0/100735-1.pdf)
Supplement: 100735-1.pdf [file 100735-1.pdf]

**Table S1. RAG1/2-like copies in *P. flava* genomes.**

Orange color = complete RAG-like protein  
 Yellow color = RAG1/2-like in the same scaffold

RAG1x – RAG2x : Not phylogenetically assigned

**Genomics**

| Species         | Genomics | RAG ID                    | scaffold ID                                 |
|-----------------|----------|---------------------------|---------------------------------------------|
| <i>P. flava</i> |          | RAG1A-like                | <b>BCFJ01043787.1</b>                       |
| <i>P. flava</i> |          | RAG1A-like                | <b>BCFJ01026384.1</b>                       |
| <i>P. flava</i> |          | RAG1A-like                | BCFJ01053939.1                              |
| <i>P. flava</i> |          | RAG1A-like                | BCFJ01053937.1                              |
| <i>P. flava</i> |          | RAG1A-like                | BCFJ01050366.1                              |
| <i>P. flava</i> |          | RAG1B1-like – RAG2B1-like | BCFJ01017854_/BCFJ01152714.1_BCFJ01052781.1 |
| <i>P. flava</i> |          | RAG1B1-like – RAG2B1-like | BCFJ01094280.1                              |
| <i>P. flava</i> |          | RAG1B1-like               | <b>BCFJ01096996.1</b>                       |
| <i>P. flava</i> |          | RAG2Bb-like               | <b>BCFJ01034179.1</b>                       |
| <i>P. flava</i> |          | RAG2Bc-like               | <b>BCFJ01293284.1</b>                       |
| <i>P. flava</i> |          | RAG2Bc-like               | BCFJ01291212.1                              |
| <i>P. flava</i> |          | RAG1Bd-like – RAG2Bd-like | <b>BCFJ01059137.1</b>                       |
| <i>P. flava</i> |          | RAG1Bd-like               | <b>BCFJ01067914.1</b>                       |
| <i>P. flava</i> |          | RAG1Bd-like               | <b>BCFJ01059136.1</b>                       |
| <i>P. flava</i> |          | RAG1Bd-like               | <b>BCFJ01281385.1</b>                       |
| <i>P. flava</i> |          | RAG1x-like – RAG2x-like   | BCFJ01006354.1                              |
| <i>P. flava</i> |          | RAG1B-like                | <b>BCFJ01097859.1</b>                       |
| <i>P. flava</i> |          | RAG1B-like                | <b>BCFJ01065830.1</b>                       |
| <i>P. flava</i> |          | RAG1B-like                | <b>BCFJ01171729.1</b>                       |
| <i>P. flava</i> |          | RAG2B-like                | <b>BCFJ01142432.1</b>                       |
| <i>P. flava</i> |          | RAG1C-like – RAG2C-like   | <b>BCFJ01036631.1</b>                       |
| <i>P. flava</i> |          | RAG1C-like                | <b>BCFJ01041895.1</b>                       |
| <i>P. flava</i> |          | RAG1C-like                | BCFJ01047137.1                              |

|                 |            |                       |
|-----------------|------------|-----------------------|
| <i>P. flava</i> | RAG1C-like | BCFJ01088492.1        |
| <i>P. flava</i> | RAG1C-like | BCFJ01263664.1        |
| <i>P. flava</i> | RAG1C-like | <b>BCFJ01236165.1</b> |
| <i>P. flava</i> | RAG1C-like | <b>BCFJ01236166.1</b> |

| Species         | Transcript | RAG ID               | scaffold ID               |
|-----------------|------------|----------------------|---------------------------|
| <i>P. flava</i> | TRANSCRIPT | RAG1A -like          |                           |
| <i>P. flava</i> | TRANSCRIPT | RAG1B-like (allele)  | <b>gb GDGM01438088.1 </b> |
| <i>P. flava</i> | TRANSCRIPT | RAG2B-like (allele)* | gb GDGM01245220.1         |
| <i>P. flava</i> |            | RAG2B-like (allele)* | gb GDGM01047156.1         |
| <i>P. flava</i> | TRANSCRIPT | RAG2Bc-like          |                           |
| <i>P. flava</i> | TRANSCRIPT | RAG1C-like (allele)* | <b>gb GDGM01025609.1 </b> |
| <i>P. flava</i> | TRANSCRIPT | RAG2C-like (allele)* | gb GDGM01097917.1         |
| <i>P. flava</i> | TRANSCRIPT | RAG2E-like           | gb GDGM01150449.1         |

Another RAG2-like transcript not analyzed with a 96% of Ident to BCFJ01127436.1 is **GDGM01229808.1**.

| RAG1-like |       | RAG2-like |     |
|-----------|-------|-----------|-----|
| Start     | End   | Start     | End |
| 6511      | 7692  |           |     |
| 8838      | 11546 |           |     |
| 588       | 2285  |           |     |
| 155       | 415   |           |     |
| 1104      | 1367  |           |     |

|       |       |      |       |
|-------|-------|------|-------|
| *     |       | 2256 | 4186  |
| 11811 | 10838 | 8625 | 10516 |
| 1529  | 3333  |      |       |

9714 10894

2 562

2 220

|      |      |      |      |
|------|------|------|------|
| 3484 | 5013 | 5496 | 7684 |
| 9267 | 7317 |      |      |
| 9896 | 9976 |      |      |
| 941  | 3    |      |      |

|      |      |      |      |
|------|------|------|------|
| 6381 | 4010 | 3854 | 3016 |
|------|------|------|------|

2644 4283

27741 26621

1474 200

|     |       |       |       |
|-----|-------|-------|-------|
| 888 | 10209 | 11187 | 14650 |
|-----|-------|-------|-------|

5629 7445

43 237

|      |     |
|------|-----|
| 224  | 601 |
| 1296 | 994 |
| 340  | 5   |
| 340  | 5   |

| RAG1  |      | RAG2  |     |
|-------|------|-------|-----|
| Start | End  | Start | End |
| 87    | 3011 |       |     |
|       |      | 325   | 2   |
|       |      | 205   | 20  |
| 2     | 1876 |       |     |
|       |      | 25    | 739 |
|       |      | 3     | 476 |

---

---

Structure

---

---

TSD-5TIR-RAG1-RAG2-3TIR-TSD

TSD-5TIR-RAG1-RAG2-3TIR-TSD

TSD-5TIR-RAG1-RAG2-3TIR-TSD

TSD-5TIR-RAG1

---

---

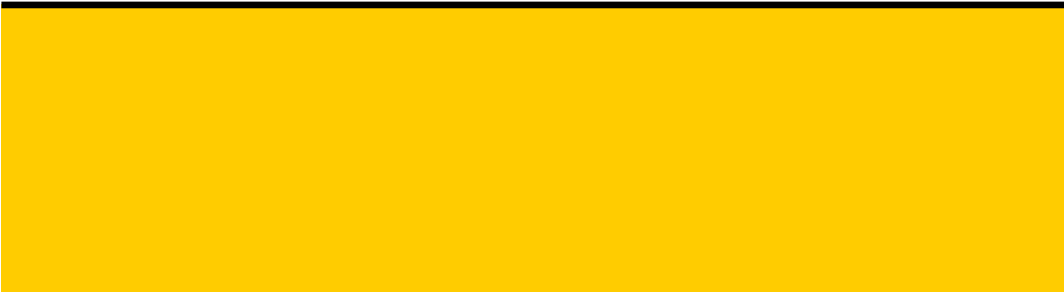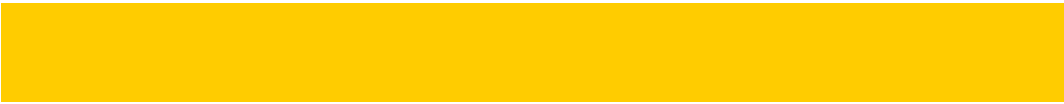

---

---

TSD Sequence

---

---

>Pfl\_B1\_BCFJ01017854\_BCFJ01052781  
ccgCTGCGtgc

>Pfl\_B1\_BCFJ01094280  
gccCAATGtgc

>Pfl\_C\_BCFJ01036631\_5  
CacCATCCgtg  
>Pfl\_C\_BCFJ01036631\_3  
gtgCATCCgta

>Pfl\_C\_BCFJ01047137  
gtgCATTG---

---

---





---

---

TIR sequence

---

---

>Pfl\_B1\_BCFJ01052781\_3\_71\_bp  
CAC----ATATCAATTACCGGTAACCGATAG----CGAATCGTAAAAAATCAACATGGCCGCCT  
>Pfl\_B\_BCFJ01017854\_5\_71\_bp  
CACTTATAGAGCAGCTANGAGCGCCATCTTG----CTAATTATAAATTATAATGACTGTATGAT  
>Pfl\_B1\_BCFJ01094280\_3\_71\_bp  
CACCTATATATCAATTACATGTAACCGATAG----CAAATCGTAAAAAATCAAAATGGCCGC  
>Pfl\_B1\_BCFJ01094280\_5\_71\_bp  
CACTTTGCGAGCAGCTANGAACGCCATGTTG----CTAATTATAAATAATTAATAATTATATTGA

>Pfl\_C\_BCFJ01036631\_3\_71\_bp  
CACATCGCATTGTACCTGATTAAACCATTAGAA—  
ATATGCTTTGTTTAGTTGCGG--GCAAAT  
>Pfl\_C\_BCFJ01036631\_5\_71\_bp  
CACATCGCATTCTCTTTTAGAAATTTGCTTG----TTCAATTACGCGC

>Pfl\_C\_BCFJ01047137\_5\_71\_bp  
TACATCGCATTCTCTTTTAGAAATTTGCTTG----TTCAATTACGCGCGCATGCGCCAACATTTC

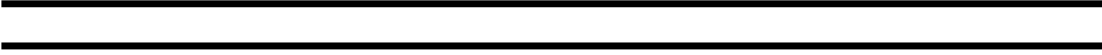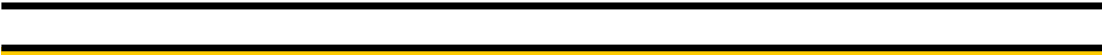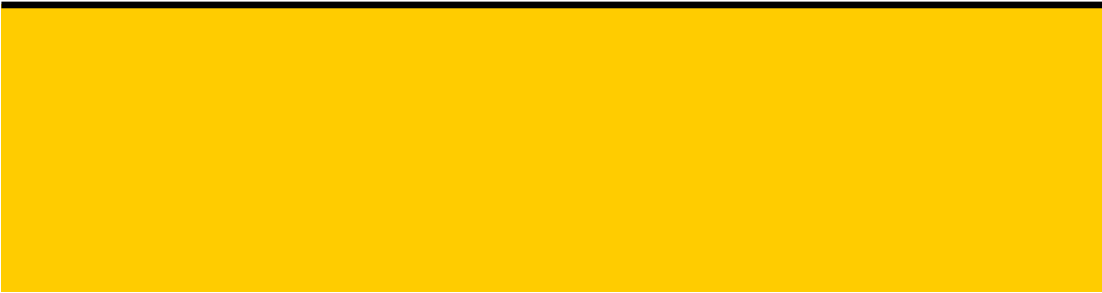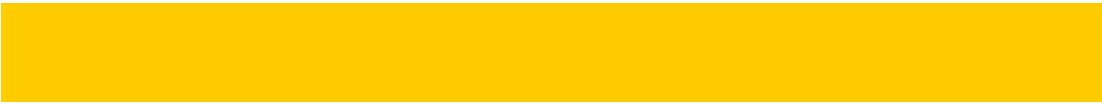

---

**Notes**

---

Pseudogene (stop codon)

Pseudogene (stop codon)

Pseudogene (stop at the beginning of the contig)

Pseudogene (stop codon)

**\*Note: RAG1B 1575-139 (BCFJ01152714.1) + 3-1918 (BCFJ01052781.1)**

Pseudogene (stop codon)

Pseudogene (stop codon)

Short Scaffold. Length: 697

*P. flava*

Short Scaffold. Length: 221

*P. flava*

Pseudogene (stop codon)

Intron

Pseudogene (stop codon)

\*Probably from RAG1H family (Query 100% & Ident 75%)

Pseudogene (stop codon)

Pseudogene (stop codon)

Pseudogene (stop codon)

Pseudogene (stop codon)

Intron vs Exon: With Spidey (DNA vs mRNA) we observe a single exon (Genomic coordinates 8334-102

Pseudogene (stop codon).

Pseudogene (stop codon).

Pseudogene (stop codon).

---

**Notes**

---

\*\*\*\*\* Contig 2 \*\*\*\*\*

gb|GDGM01238538.1|+ Length 996

gb|GDGM01177394.1|+ is in gb|GDGM01238538.1|+

gb|GDGM01469753.1|+ is in gb|GDGM01238538.1|+

gb|GDGM01063948.1|+ is in gb|GDGM01469753.1|+

gb|GDGM01085983.1|+ is in gb|GDGM01238538.1|+

Intron vs Exon: E

*Other transcripts:*

gb|GDGM01014902.1|

gb|**GDGM01481817.1**|

Frame 3

*\*RAG2B potential transcript. Length: 327*

*\*RAG2B potential transcript. Length: 205*

\*\*\*\*\* Contig 1 \*\*\*\*\*

gb|GDGM01081107.1|+

gb|GDGM01504835.1|+ is in gb|GDGM01081107.1|+

*\*RAG1C potential transcript. Length: 1937*

*\*RAG2C potential transcript. Length: 1641*

*Length: 528*

!71 and mRNA coordinates 1-1937) with a length of 1937bases and a 99.2% of Ident; blastx 2 sequences: We find 3 introns ( Query 1 / Sbjct 888\_\_C

Expasy Frame 2. Traduction: Positions 503-1499; blastx 2 sequeences: ( Query 1 / Sbjct 4712 - Query 996 / Sbjct 7692)

ijct1532 - INTRON - Query 216 / Sbjct 6621\_\_Query292 / Sbjct6848 - INTRON - Query293 / Sbjct 7552\_\_Query348 / Sbjct 7716 - .





INTRON - Query349 / Sbjct8164\_\_Query1030 / Sbjct10209)



**Table S2. *RAG1/2-like* copies in *Saccoglossus kowalevskii* genomes.**

**Genomics**

*We do not find significant results (NS)*

**Transcripts**

We do not find any TSA project

S. kowalevskii

A. japonica

**Table S3. *RAG1/2-like* copies in *Anneissia japonica* genomes.**

**Genomics**

We do not find WGS project

**Transcripts**

We do not find significant transcript results.

A. japonica

**Table S4. *RAG1/2-like* copies in *Psathyrometra fragilis* genomes.**

**Genomics**

We do not find WGS project

**Transcripts**

We do not find significant transcript results.

*P. fragilis*



A. albatrossi

**Table S5. *RAG1/2-like* copies in *Abyssocucumis albatrossi* genomes.**

**Genomics**

We do not find WGS project

**Transcripts**

We do not find significant transcript results.

A. albatrossi

S. briareus

**Table S6. *RAG1/2-like* copies in *Sclerodactyla briareus* genomes.**

**Genomics**

We do not find WGS project

**Transcripts**

We do not find significant transcript results.

S. briareus

A. japonicus

**Table S7. *RAG1/2-like* copies in *Apostichopus japonicus* genomes.**

**Genomics**

We do not find WGS project

**Transcripts**

We do not find significant transcript results.

A. japonicus

P. parvimensis

**Table S8. *RAG1/2-like* copies in *Parastichopus parvimensis* genomes.**

**Genomics**

*We do not find significant results (NS)*

**Transcripts**

We do not find any TSA project

*P. parvimensis*



**Table S9. *RAG1/2-like* copies in *Parastichopus californicus* genomes.**

**Genomics**

We do not find WGS project

**Transcripts**

We do not find significant transcript results.

*P. californicus*

**Table S10. RAG1/2-like copies in *Echinarachnius parma* genomes.****Genomics**

We do not find WGS project

**Transcripts**

| Species         | Transcript | RAG ID      | scaffold ID    | RAG1-like |     | RAG2-like |     |
|-----------------|------------|-------------|----------------|-----------|-----|-----------|-----|
|                 |            |             |                | Start     | End | Start     | End |
| <i>E. parma</i> | TRANSCRIPT | RAG1B1-like | Contig1        |           |     |           |     |
| <i>E. parma</i> | TRANSCRIPT | RAG1B1-like | GAVF01032929.1 | 1         | 789 |           |     |
| <i>E. parma</i> | TRANSCRIPT | RAG1B1-like | GAVF01009690.1 | 5         | 607 |           |     |
| <i>E. parma</i> | TRANSCRIPT | RAG2B1-like | Contig2        |           |     |           |     |
| <i>E. parma</i> | TRANSCRIPT | RAG2B1-like | Contig1        |           |     |           |     |
| <i>E. parma</i> | TRANSCRIPT | RAG2B1-like | GAVF01015158.1 |           |     | 15        | 875 |

Transcript fragments for **RAG1-like** (GAVF01077322.1 & GAVF01077325.1)

**RAG2-like** transcript fragments (GAVF01052863.1 & GAVF01015159.1).

\*RAG1-like of *E. parma* are different from each other and they are part of the RAG1B1-like family.

\*RAG2-like of *E. parma* are different from each other and they are likely to be part of the RAG2B-like fam

E. parma

---

**Notes**

---

gi|638076396|gb|GAVF01032928.1|+ \*  
gi|638076394|gb|GAVF01032930.1|+

Length: 840 \*

Length: 690 \*

gi|638056455|gb|GAVF01052869.1|+  
gi|638056452|gb|  
GAVF01052872.1|+ is in gi|638056455|gb|  
GAVF01052869.1|+ \*

gi|638056454|gb|  
GAVF01052870.1|+ is in gi|638056455|gb|  
GAVF01052869.1|+ Length: 1255

gi|638056450|gb|GAVF01052874.1|+  
gi|638056457|gb|GAVF01052867.1|+ \*  
gi|638056453|gb|GAVF01052871.1|+

Length: 1195

ily.

E. chloroticus

**Table S11. RAG1/2-like copies in Evechinus chloroticus genomes.**

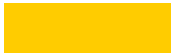

Orange color = complete RAG-like protein

**Genomics**

There is no WGS project

**Transcripts**

| Species               | Transcript | RAG ID      | scaffold ID    | RAG1-like |      | RAG2-like |      |
|-----------------------|------------|-------------|----------------|-----------|------|-----------|------|
|                       |            |             |                | Start     | End  | Start     | End  |
| <i>E. chloroticus</i> | TRANSCRIPT | RAG1B2-like | GAPB01003278.1 | 596       | 2638 |           |      |
| <i>E. chloroticus</i> | TRANSCRIPT | RAG1B2-like | GAPB01008000.1 | 324       | 1931 |           |      |
| <i>E. chloroticus</i> | TRANSCRIPT | RAG1B2-like | GAPB01020750.1 | 45        | 1340 |           |      |
| <i>E. chloroticus</i> | TRANSCRIPT | RAG1B2-like | GAPB01045749.1 |           |      |           |      |
| <i>E. chloroticus</i> | TRANSCRIPT | RAG1B2-like | GAPB01022367.1 |           |      |           |      |
| <i>E. chloroticus</i> | TRANSCRIPT | RAG2B2-like | Contig 1       |           |      |           |      |
| <i>E. chloroticus</i> | TRANSCRIPT | RAG2B2-like | GAPB01063365.1 |           |      | 3293      | 2442 |

\*RAG1-like of Evechinus chloroticus are different from each other and they are likely to be part of the RAG1

\*RAG2-like of Evechinus chloroticus are different from each other and they are likely to be part of the RAG2

E. chloroticus

---

**Notes**

---

*Length: 3050\* Frame 2. Traduction positions 156-2637*

*Length: 2875\**

*Length: 1340\**

*gi|559439143|gb|  
GAPB01022632.1|+  
gi|559439142|gb|  
GAPB01022633.1|+ \*  
RAG2 potential  
transcript of  
NM\_001033012.2*

*RAG2 potential transcriptn of NM\_001033012.2. Length: 3383 \**

B2-like family.

B2-like family.

**Table S12. RAG1/2-like copies in *Strongylocentrotus purpuratus***

|  |
|--|
|  |
|  |

RAG2x : Not phylogenetically assigned

## Genomics

### Species

There are not included those with a Query cover <15% and a Ident <58%

*S. purpuratus*

## Transcripts

- RAG2-like paralog, with 80% identity (**JT103600.1** – Transcript of **AAGJ05108197.1** [RAG2B
- A more divergent paralog with several stop codons (pseudogene) called RAG2B1-like (GAVU01
- Very close transcript sequences (**JT106157.1** & **GAVU01023365.1** – Transcripts of **AAGJ05119**
- Some fragments named (Contig1\_Rag2, GAVU01022021.1 – Both transcript fragment of **AAGJ**

- RAG1-like close paralog (**Contig1\_RAG1**),

- Divergent paralog named RAG1B2-like (GAVU01011698.1 – Partial transcript of **AAGJ050523**

- Fragments named (GAVU01024843.1 –Partial transcript of **AAGJ05107091.1** (Query 85% & Id

**GAVU01036260.1** – Partial transcript of **AAGJ05119967.1** (Query 25% & Ident 100%)

**GAVU01022227.1** – Partial transcript of **AAGJ05116911.1** (Query 100% & Ident 100%) & Conti

Notes:

Contig1\_RAG2-like= gi|374748692|gb|JT099428.1|-  
gb|GAVU01042378.1|+ is in gi|374748692|gb|JT099428.1|-

Contig1\_RAG1-like= gi|374755421|gb|JT106157.1|-  
gb|GAVU01015377.1|+ is in gi|374755421|gb|JT106157.1|-

## S. purpuratus

Contig2\_RAG1-like= gb|GAVU01041231.1|+  
gi|374767377|gb|JT118113.1|+  
Gb|GAVU01028205.1|+ is in gi|374767377|gb|JT118113.1|+



S. purpuratus

**itus genomes.**

Orange color = complete RAG-like protein

Yellow color = RAG1/2-like in the same scaffold

| RAG ID                    | scaffold ID                         | RAG1-like |       | RAG2-like |
|---------------------------|-------------------------------------|-----------|-------|-----------|
|                           |                                     | Start     | End   | Start     |
| RAG1B1-like - RAG2B1-like | AAGJ05119967.1                      | 11126     | 6070  | 2882      |
| RAG1B1-like               | AAGJ05093368.1                      | 2157      | 2628  |           |
| RAG1B1-like               | AAGJ05091685.1                      | 19332     | 18460 |           |
| RAG1B1-like               | AAGJ05093365.1                      | 22467     | 24496 |           |
| RAG1B1-like               | AAGJ05093366.1                      | 6734      | 7481  |           |
| RAG1B1-like               | AAGJ05107091.1                      | 2414      | 1759  |           |
| RAG1B2-like               | AAGJ05052375.1 (3 Identical copies) | 665       | 9702  |           |
| RAG1B2-like               | AAGJ05052374.1 (3 Identical copies) | 1336      | 2049  |           |
| RAG1B2-like               | AAGJ05052370.1                      | 12342     | 18191 |           |
| RAG1B2-like               | AAGJ05086369.1                      | 8733      | 10078 |           |
| RAG2B1-like               | AAGJ05119965.1                      |           |       | 18311     |
| RAG2B1-like               | AAGJ05096689.1                      |           |       | 387       |
| RAG2B1-like               | AAGJ05108197.1                      |           |       | 16407     |
| RAG2B1-like               | AAGJ05074252.1                      |           |       | 38623     |
| RAG2B-like                | AAGJ05085999.1                      |           |       | 7488      |
| RAG2x-like                | AAGJ05080929.1                      |           |       | 1003      |

] in WGS databse).

006082.1– Transcript of AAGJ05119967.1 [Query 97% & Ident 40%])

967.1 [Query 81% & Ident 95%] & [Query 100% & Ident 99%] respectively)

05074252.1 [Query 100% & Ident 82%])

75.1. Intron vs exon: We can not predict the exon-intron structure because the genomic sequence it is not complete. Bad predic ent 87%);

**ig2\_RAG1-like)**

Transcript fragment of AAGJ05119967.1 (Query 81% & Ident 95%)

Transcripts of AAGJ05119967.1 (Query 100% & Ident 87%)

Transcript fragment of AAGJ05119967.1 (Query 100% & Ident 99%)

*S. purpuratus*

S. purpuratus

2-like

---

End Notes

---

1120 Pseudogene (stop codon at the end of RAG1-like). It correspond to RAG1/2-like published. Frame -3. It

Pseudogene (stop codon)

Pseudogene (stop codon)

Pseudogene (stop codon)

Pseudogene (stop codon)

Pseudogene (stop codon).

Pseudogene (stop codon)

18631

139

15486 Pseudogene (stop codon).

43035

10283 Cis-duplication

596 Pseudogene (stop codon). 4<sup>th</sup> locus (Partial locus very damaged)

tion.

*S. purpuratus*

*S. purpuratus*

Intron vs exon (see published article)

*S. purpuratus*

**Table S13. RAG1/2-like copies in *Paracentrotus***

RAG1x : Not phylogenetically assigned

**Genomics**

There is no WGS project

 Orange color = complete RAG-like protein  
 Yellow color = RAG1/2-like in the same scaffold

**Transcripts fragments**

| Species           | Transcript | RAG ID                  |
|-------------------|------------|-------------------------|
| <i>P. lividus</i> | TRANSCRIPT | RAG1B1-like             |
| <i>P. lividus</i> | TRANSCRIPT | RAG1B2-like             |
| <i>P. lividus</i> | TRANSCRIPT | RAG1B2-like             |
| <i>P. lividus</i> | TRANSCRIPT | RAG1B2-like_RAG2B2-like |
| <i>P. lividus</i> | TRANSCRIPT | RAG1B2-like_RAG2B2-like |
| <i>P. lividus</i> | TRANSCRIPT | RAG1B1-like             |
| <i>P. lividus</i> | TRANSCRIPT | RAG1B1-like             |
| <i>P. lividus</i> | TRANSCRIPT | RAG1B1-like             |
| <i>P. lividus</i> | TRANSCRIPT | RAG1B1-like             |
| <i>P. lividus</i> | TRANSCRIPT | RAG1B1-like             |
| <i>P. lividus</i> | TRANSCRIPT | RAG1B1-like             |
| <i>P. lividus</i> | TRANSCRIPT | RAG1B1-like             |
| <i>P. lividus</i> | TRANSCRIPT | RAG1-like               |

## P. lividus

*P. lividus* TRANSCRIPT RAG1-like

*P. lividus* TRANSCRIPT RAG1B2-like

*P. lividus* TRANSCRIPT RAG1-like



## P. lividus

*P. lividus* TRANSCRIPT RAG1-like

*P. lividus* TRANSCRIPT RAG1x-like

*P. lividus* TRANSCRIPT RAG1B2-like

*P. lividus* TRANSCRIPT RAG1-like

## P. lividus

*P. lividus* TRANSCRIPT RAG1-like  
*P. lividus* TRANSCRIPT RAG1-like  
*P. lividus* TRANSCRIPT RAG1-like  
*P. lividus* TRANSCRIPT RAG1x-like  
*P. lividus* TRANSCRIPT RAG1-like  
*P. lividus* TRANSCRIPT RAG1-like

*P. lividus* TRANSCRIPT RAG2B1-like

*P. lividus* TRANSCRIPT RAG2B2-like

\*RAG1-like of *P. lividus* are different from each other and they are likely

\*RAG2-like of *P. lividus* seems to have suffer a duplication (RAG2B1-lil

P. lividus

*tus lividus* genomes.

| scaffold ID                                              | Notes                                                                                                                                                                   |
|----------------------------------------------------------|-------------------------------------------------------------------------------------------------------------------------------------------------------------------------|
| Contig1*                                                 | gb GCZS01172032.1 <br>gb GCZS01074202.1 + is in<br>gb GCZS01172032.1                                                                                                    |
| Contig2*                                                 | gb GCZS01118857.1 +<br>gb GCZS01118856.1 + is in<br>gb GCZS01118857.1 +                                                                                                 |
| Contig3*                                                 | gb GCZS01118856.1 + is in gb <br>GCZS01118857.1 +                                                                                                                       |
| RAG1-like – RAG2-like (GCZS01045777.1)*                  |                                                                                                                                                                         |
| RAG1-like – RAG2-like (GCZS01045775.1_RAG2Contig1-like)* | gb GCZS01045775.1 +<br>gb GCZS01045776.1 + is in<br>gb GCZS01045775.1 +                                                                                                 |
| Contig16*                                                | gb GCZS01055975.1 <br>gb GCZS01009528.1 +                                                                                                                               |
| GCZS01132703.1*                                          |                                                                                                                                                                         |
| GCZS01053115.1*                                          |                                                                                                                                                                         |
| Contig4*                                                 | gb GCZS01085025.1 +<br>gb GCZS01085026.1 + is in<br>gb GCZS01085025.1 +                                                                                                 |
| GCZS01158909.1*                                          |                                                                                                                                                                         |
| GCZS01150983.1*                                          |                                                                                                                                                                         |
| Contig5_FRAGMENT                                         | gb GCZS01064032.1 +<br>gb GCZS01035764.1 + is in<br>gb GCZS01064032.1 +<br>gb GCZS01064029.1 + is in<br>gb GCZS01064032.1 +<br>gb GCZS01064037.1 +<br>gb GCZS01078431.1 |

P. lividus

GCZS01064034.1\_FRAGMENT

Contig18\_FRAGMENT

gb|GCZS01185123.1|+  
gb|GCZS01096617.1|+  
gb|GCZS01184645.1|- is in  
gb|GCZS01096617.1|+  
gb|GCZS01096621.1|+

GCZS01118862.1\_FRAGMENT

GCZS01051899.1\_FRAGMENT

GCZS01112634.1\_FRAGMENT

GCZS01112632.1\_FRAGMENT

GCZS01087284.1\_FRAGMENT

GCZS01030082.1\_FRAGMENT

GCZS01042568.1\_FRAGMENT

GCZS01021545.1\_FRAGMENT

Contig6\_FRAGMENT

*gb|GCZS01006895.1|+*  
*gb|GCZS01032509.1|+*

GCZS01044111.1\_FRAGMENT

Contig17\_FRAGMENT

gb|GCZS01087285.1|+  
gb|GCZS01087291.1|+ is in  
gb|GCZS01087285.1|+

Contig7\_FRAGMENT

*gb|GCZS01132331.1|+*  
*gb|GCZS01132329.1|+*

GCZS01097940.1\_FRAGMENT

GCZS01089541.1\_FRAGMENT

GCZS01014750.1\_FRAGMENT

GCZS01055973.1\_FRAGMENT

GCZS01096624.1\_FRAGMENT

GCZS01078430.1\_FRAGMENT

Contig8\_FRAGMENT

*gb|GCZS01049902.1|+*  
*gb|GCZS01049901.1|+ is in*  
*gb|GCZS01049902.1|+*  
*gb|GCZS01049900.1|+*

GCZS01031833.1\_FRAGMENT

P. lividus

Contig20\_FRAGMENT  
*gb|GCZS01091464.1|+*  
*gb|GCZS01091461.1|+ is in*  
*gb|GCZS01091464.1|+*  
*gb|GCZS01091466.1|+*  
*gb|GCZS01091463.1|+ is in*  
*gb|GCZS01091466.1|+*

Contig15\_FRAGMENT  
*gb|GCZS01019540.1|+*  
*gb|GCZS01019539.1|+*

Contig10\_FRAGMENT  
*gb|GCZS01091460.1|+*  
*gb|GCZS01091465.1|+*

GCZS01077077.1\_FRAGMENT

Contig9\_FRAGMENT  
*gb|GCZS01077078.1|+*  
*gb|GCZS01077076.1|+ is in*  
*gb|GCZS01077078.1|+*

GCZS01132704.1\*

Contig12\*  
*gb|GCZS01013198.1|+*  
*gb|GCZS01013199.1|+*

Contig11\_FRAGMENT  
*gb|GCZS01033997.1|-*  
*gb|GCZS01152001.1|+ is in*  
*gb|GCZS01033997.1|-*

Contig13\_FRAGMENT  
*gb|GCZS01064627.1|+*  
*gb|GCZS01064628.1|+*  
*gb|GCZS01064630.1|+ is in*  
*gb|GCZS01064628.1|+*

Contig14\_FRAGMENT  
*gb|GCZS01149128.1|+*  
*gb|GCZS01019259.1|+*

GCZS01007361.1\_FRAGMENT  
GCZS01170336.1\_FRAGMENT  
GCZS01055974.1\_FRAGMENT  
GCZS01052670.1\_FRAGMENT  
GCZS01039677.1\_FRAGMENT  
GCZS01026987.1\_FRAGMENT  
GCZS01122106.1\_FRAGMENT  
GCZS01087287.1\_FRAGMENT  
GCZS01033022.1\_FRAGMENT

## P. lividus

GCZS01057007.1\_FRAGMENT

GCZS01027952.1\_FRAGMENT

GCZS01174585.1\_FRAGMENT

Contig19\*

gb|GCZS01072522.1|+  
gb|GCZS01072519.1|+

GCZS01057812.1\_FRAGMENT

GCZS01156562.1\_FRAGMENT

GCZS01182744.1\*

Contig2\*

gb|GCZS01031274.1|+  
gb|GCZS01031273.1|+ is in  
gb|GCZS01031274.1|+

to be part of the RAG1B1-like & RAGB2-like families.  
(RAG1B1-like & RAG2B2-like).

S. granularis

**Table S14. RAG1/2-like copies in *Sphaerechinus granularis* genom**

RAG1x – RAG2x : Not phylogenetically assigned

**Genomics**

There is no WGS project

**Transcripts**

| Species              | Transcript | RAG ID     | scaffold ID    | RAG1-like |     | RAG2-like |     |
|----------------------|------------|------------|----------------|-----------|-----|-----------|-----|
|                      |            |            |                | Start     | End | Start     | End |
| <i>S. granularis</i> | TRANSCRIPT | RAG2x-like | GAVR01037695.1 |           |     | 1597      | 755 |

Transcript fragments for **RAG1-like** (GAVP01036659.1, GAVR01070653.1, GAVR01070662.1, GAVR01

Transcript fragment for **RAG2-like** (GAVR01004062.1).

S. granularis

ies.

---

**Notes**

---

*RAG2 potential transcript of NM\_001033012.2. Length: 1668* \*

**070656.1, GAVR01070663.1, GAVR01023727.1, GAVR01049989.1, GAVR01049990.1, GAVR01090577.1)**



L. variegatus

**Table S15. RAG1/2-like copies in *Lytechinus variegatus* genomes.**

RAG2x : Not phylogenetically assigned

| <b>Genomics</b>                                                       |             |                | RAG1-like |       | RAG2-like |                                |
|-----------------------------------------------------------------------|-------------|----------------|-----------|-------|-----------|--------------------------------|
| Species                                                               | RAG ID      | scaffold ID    | Start     | End   | Start     | End Notes                      |
| There are included those with a Query cover >13%. Smallest Ident; 33% |             |                |           |       |           |                                |
| <i>L. variegatus</i>                                                  | RAG1B1-like | AGCV02054232.1 | 6377      | 9006  |           | Pseudogene (stop codon).       |
| <i>L. variegatus</i>                                                  | RAG1B1-like | AGCV02411413.1 | 30469     | 23113 |           | Pseudogene (stop codon).       |
| <i>L. variegatus</i>                                                  | RAG1B1-like | AGCV02253428.1 | 684       | 159   |           | Pseudogene (stop codon)        |
| <i>L. variegatus</i>                                                  | RAG1B-like  | AGCV02377058.1 | 2793      | 4091  |           | Pseudogene (stop codon)        |
| <i>L. variegatus</i>                                                  | RAG1B-like  | AGCV02060696.1 | 13096     | 11036 |           |                                |
| <i>L. variegatus</i>                                                  | RAG1B1-like | AGCV02009112.1 | 2792      | 3622  |           | Pseudogene (stop codon)        |
| <i>L. variegatus</i>                                                  | RAG1B-like  | AGCV02405259.1 | 1761      | 20426 |           | Pseudogene (stop codon)        |
| <i>L. variegatus</i>                                                  | RAG1B-like  | AGCV02139577.1 | 337       | 837   |           | <i>Similar to RAG1F family</i> |
| <i>L. variegatus</i>                                                  | RAG1B1-like | AGCV02280906.1 | 495       | 1     |           | Pseudogene (stop codon)        |
| <i>L. variegatus</i>                                                  | RAG1B-like  | AGCV02064217.1 | 4585      | 5202  |           | Pseudogene (stop codon)        |
| <i>L. variegatus</i>                                                  | RAG1??-like | AGCV02077315.1 | 455       | 11    |           | Pseudogene (stop codon)        |
| <i>L. variegatus</i>                                                  | RAG1??-like | AGCV02050095.1 | 50        | 491   |           | Pseudogene (stop codon)        |
| <i>L. variegatus</i>                                                  | RAG2x-like  | AGCV02054233.1 |           |       | 2797      | 1952                           |
| <i>L. variegatus</i>                                                  | RAG2x-like  | AGCV02250166.1 |           |       | 734       | 1834                           |

**Transcripts**

We can find very short **RAG1-like** transcripts (**GAUR01031317.1** – Partial transcript of **AGCV02009112.1**)

A. punctulata

**Table S16. *RAG1/2-like* copies in *Arbacia punctulata* genomes.**

**Genomics**

There is no WGS project

**Transcripts**

We do not find significant transcript results.

A. punctulata

E. tribuloides

**Table S17. RAG1/2-like copies in *Eucidaris tribuloides* genomes.**

| <b>Genomics</b>                                                       |                                                                          |                                |                 | RAG1-like |       | RAG2-like |
|-----------------------------------------------------------------------|--------------------------------------------------------------------------|--------------------------------|-----------------|-----------|-------|-----------|
| Species                                                               | Genomics                                                                 | RAG ID                         | scaffold ID     | Start     | End   | Start     |
|                                                                       | Orange color = complete RAG-like protein                                 |                                |                 |           |       |           |
|                                                                       | Yellow color = RAG1/2-like in the same scaffold                          |                                |                 |           |       |           |
|                                                                       | RAG1B2a-like = 2 <sup>nd</sup> duplication in RAG2B-locus in echinoderms |                                |                 |           |       |           |
|                                                                       | RAG2x-like : Not phylogenetically assigned                               |                                |                 |           |       |           |
| There are not included those with a Query cover <20% and a Ident <30% |                                                                          |                                |                 |           |       |           |
| <i>E. tribuloides</i>                                                 |                                                                          | RAG1B1-like – RAG2B1-like      | JZLH010201023.1 | 14471     | 10246 | 2995      |
| <i>E. tribuloides</i>                                                 |                                                                          | RAG1B1-like                    | JZLH010588349.1 | 14331     | 12831 |           |
| <i>E. tribuloides</i>                                                 |                                                                          | RAG1B1-like                    | JZLH010926899.1 | 4294      | 8170  |           |
| <i>E. tribuloides</i>                                                 |                                                                          | RAG1B2-like – RAG2B2-like      | JZLH010192588.1 | 13937     | 9563  | 3258      |
| <i>E. tribuloides</i>                                                 |                                                                          | RAG1B2-like                    | JZLH010924454.1 | 5745      | 3014  |           |
| <i>E. tribuloides</i>                                                 |                                                                          | RAG1B2-like                    | JZLH010604796.1 | 992       | 10    |           |
| <i>E. tribuloides</i>                                                 |                                                                          | RAG1B2-like                    | JZLH010204041.1 | 1134      | 3739  |           |
| <i>E. tribuloides</i>                                                 |                                                                          | RAG1B-like                     | JZLH010029400.1 | 2894      | 927   |           |
| <i>E. tribuloides</i>                                                 |                                                                          | RAG1B-like                     | JZLH010807551.1 | 9475      | 8027  |           |
| <i>E. tribuloides</i>                                                 |                                                                          | RAG1B-like                     | JZLH010603647.1 | 21368     | 19904 |           |
| <i>E. tribuloides</i>                                                 |                                                                          | RAG1B2a-like                   | JZLH010134053.1 | 10199     | 8415  |           |
| <i>E. tribuloides</i>                                                 |                                                                          | RAG1B2a-like                   | JZLH010598024.1 | 7158      | 4750  |           |
| <i>E. tribuloides</i>                                                 |                                                                          | RAG1B2a-like                   | JZLH010877503.1 | 13693     | 15641 |           |
| <i>E. tribuloides</i>                                                 |                                                                          | RAG1B2a-like                   | JZLH010598025.1 | 2004      | 207   |           |
| <i>E. tribuloides</i>                                                 |                                                                          | RAG1B2a-like                   | JZLH010996576.1 | 4563      | 2869  |           |
| <i>E. tribuloides</i>                                                 |                                                                          | RAG1B2-like                    | JZLH010706307.1 | 7403      | 6484  |           |
| <i>E. tribuloides</i>                                                 |                                                                          | RAG1B2-like                    | JZLH010196803.1 | 21037     | 15964 |           |
| <i>E. tribuloides</i>                                                 |                                                                          | RAG1B2-like                    | JZLH010208141.1 | 607       | 1495  |           |
| <i>E. tribuloides</i>                                                 |                                                                          | RAG1B2a-like                   | JZLH010672642.1 | 700       | 62    |           |
| <i>E. tribuloides</i>                                                 |                                                                          | RAG1B2a-like                   | JZLH010402919.1 | 4850      | 3862  |           |
| <i>E. tribuloides</i>                                                 |                                                                          | RAG1B2a-like                   | JZLH010570475.1 | 11038     | 11899 |           |
| <i>E. tribuloides</i>                                                 |                                                                          | RAG1B2a-like                   | JZLH010221689.1 | 3230      | 108   |           |
| <i>E. tribuloides</i>                                                 |                                                                          | RAG1B2-like                    | JZLH010196804.1 | 7424      | 3632  |           |
| <i>E. tribuloides</i>                                                 |                                                                          | Fragment                       | JZLH010939303.1 | 3589      | 8274  |           |
| <i>E. tribuloides</i>                                                 |                                                                          | RAG1B2-like                    | JZLH010095137.1 | 11504     | 10225 |           |
| <i>E. tribuloides</i>                                                 |                                                                          | Fragment                       | JZLH011004596.1 | 10667     | 11554 |           |
| <i>E. tribuloides</i>                                                 |                                                                          | Fragment                       | JZLH010900583.1 | 5058      | 4335  |           |
| <i>E. tribuloides</i>                                                 |                                                                          | Fragment                       | JZLH010294192.1 | 10561     | 11422 |           |
| <i>E. tribuloides</i>                                                 |                                                                          | Fragment                       | JZLH010900582.1 | 4994      | 4288  |           |
| <i>E. tribuloides</i>                                                 |                                                                          | Fragment                       | JZLH010098881.1 | 31285     | 29711 |           |
| <i>E. tribuloides</i>                                                 |                                                                          | RAG1-like_Fragment – RAG2-like | JZLH010790248.1 | 5310      | 3950  | 1049      |
| <i>E. tribuloides</i>                                                 |                                                                          | Fragment                       | JZLH010015240.1 | 7447      | 6926  |           |
| <i>E. tribuloides</i>                                                 |                                                                          | RAG2B2-like                    | JZLH010009838.1 |           |       | 12398     |
| <i>E. tribuloides</i>                                                 |                                                                          | RAG2B2-like                    | JZLH010087786.1 |           |       | 25040     |

E. tribuloides

|                       |             |                 |       |
|-----------------------|-------------|-----------------|-------|
| <i>E. tribuloides</i> | RAG2B2-like | JZLH010464424.1 | 3701  |
| <i>E. tribuloides</i> | RAG2x-like  | JZLH010029397.1 | 6567  |
| <i>E. tribuloides</i> | Fragment    | JZLH010089547.1 | 4092  |
| <i>E. tribuloides</i> | Fragment    | JZLH010921857.1 | 1601  |
| <i>E. tribuloides</i> | Fragment    | JZLH010078708.1 | 12883 |
| <i>E. tribuloides</i> | Fragment    | JZLH010941783.1 | 1120  |

**Transcripts**

We find only one transcript for RAG2-like (GAZP01042598.1) RAG1-like    RAG:

| Species               | Transcript | RAG ID    | scaffold ID    | Start | End | Start |
|-----------------------|------------|-----------|----------------|-------|-----|-------|
| <i>E. tribuloides</i> | TRANSCRIPT | RAG2-like | GAZP01042598.1 |       |     | 810   |

E. tribuloides

2-like

**End**

7018

6615

837

11550

19648

E. tribuloides

7589

9709

3472

1063

13301

110

2-like

---

**End**

---

4

E. tribuloides

---

Notes

---

---

RAG1-like blastx 2 sequences: Query1 / Subject14486\_\_Query62 / Subjet 14301 - INTRON - Query63 / Subject13279\_\_Query241/Subject12743 - IN

Pseudogene (stop codon).

Pseudogene (stop codon).

Pseudogene (stop codon).

Pseudogene (stop codon)

Pseudogene (stop codon).

Pseudogene (stop codon).

Pseudogene (stop codon)

Pseudogene (stop codon).

Pseudogene (stop codon).

Pseudogene (stop codon).

Pseudogene (stop codon).

Pseudogene (stop codon)

Pseudogene (stop codon)

Pseudogene (stop codon)

Pseudogene (stop codon)

Pseudogene (stop codon).

Pseudogene (stop codon)

Pseudogene (stop codon).

Pseudogene (stop codon).



E. tribuloides

Pseudogene (stop codon)

Pseudogene (stop codon)

Pseudogene (stop codon)

Pseudogene (stop codon)

---

**Notes**

*Length: 914*

*Partial transcript of [JZLH010941783.1](#) (Query 97% & Ident 70%)*

E. tribuloides

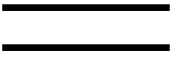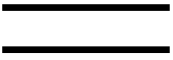

E. tribuloides

O. spiculata

**Table S18. RAG1/2-like copies in *Ophiothrix spiculata* genomes.**

| <b>Genomics</b>                                                       |                                 |                    | RAG1-like    |            | RAG2-like    |            |
|-----------------------------------------------------------------------|---------------------------------|--------------------|--------------|------------|--------------|------------|
| <b>Species</b>                                                        | <b>RAG ID</b>                   | <b>scaffold ID</b> | <b>Start</b> | <b>End</b> | <b>Start</b> | <b>End</b> |
| RAG1x : Not phylogenetically assigned                                 |                                 |                    |              |            |              |            |
| There are included those with a Query cover >14%. Smallest Ident; 30% |                                 |                    |              |            |              |            |
| <i>O. spiculata</i>                                                   | RAG1B-like (1) – RAG2B-like (1) | JXSR01321259.1     | 6431         | 8453       | 8640         | 9326       |
| <i>O. spiculata</i>                                                   | RAG1B-like (1)                  | JXSR01137909.1     | 3884         | 2097       |              |            |
| <i>O. spiculata</i>                                                   | RAG1B-like (1)                  | JXSR01509747.1     | 1802         | 2543       |              |            |
| <i>O. spiculata</i>                                                   | RAG1B-like (1)                  | JXSR01424580.1     | 1074         | 2029       |              |            |
| <i>O. spiculata</i>                                                   | RAG1B-like (1)                  | JXSR01174233.1     | 12379        | 7877       |              |            |
| <i>O. spiculata</i>                                                   | RAG1x2-like                     | JXSR01257084.1     | 3067         | 4401       |              |            |
| <i>O. spiculata</i>                                                   | RAG1x1-like                     | JXSR01326072.1     | 112          | 1260       |              |            |
| <i>O. spiculata</i>                                                   | RAG1x1-like                     | JXSR01313620.1     | 9747         | 11432      |              |            |
| <i>O. spiculata</i>                                                   | RAG1x3-like                     | JXSR01590818.1     | 7864         | 8317       |              |            |
| <i>O. spiculata</i>                                                   | RAG1B-like (2)                  | JXSR01445370.1     | 2127         | 2672       |              |            |

**Transcripts**

We do not find any TSA project

O. spiculata

---

**Notes**

---

---

---



Pseudogene (stop codon)

Pseudogene (stop codon).

Pseudogene (stop codon)

**Table S19. RAG1/2-like copies in *Ophiocoma echinata* genomes.**

**Genomics**

There is no WGS project

**Transcripts**

Transcript fragments in RAG2-like (GAUQ01068411.1)

Transcript fragments for RAG1-like (GAUQ01034189.1\*, GAUQ01007173.1\* & Contig1)

\* There are too small to be classified. Both RAG1-like are the same.

|          |              |
|----------|--------------|
|          | GAUQ0105869  |
| Contig 1 | 7.1 +        |
|          | gj 637410679 |
|          | gb           |

O. echinata

Henricia sp. AR-2014

**Table S20. RAG1/2-like copies in *Henricia sp. AR-2014* genomes.**

RAG2x-like : Not phylogenetically assigned

**Genomics**

There is no WGS project

**Transcripts**

| Species             | Transcript | RAG ID     | scaffold ID    | RAG1-like |      | RAG2-like |      |
|---------------------|------------|------------|----------------|-----------|------|-----------|------|
|                     |            |            |                | Start     | End  | Start     | End  |
| <i>Henricia sp.</i> | TRANSCRIPT | RAG1B-like | GAVP01020485.1 | 26        | 1450 |           |      |
| <i>Henricia sp.</i> | TRANSCRIPT | RAG2x-like | GAVP01027111.1 |           |      | 194       | 1009 |

Transcript fragments for RAG1-like (**GAVP01020484.1\***, **GAVP01036659.1**, GAVP01036658.1 & GAVP0

\*RAG1-like of *Henricia sp.* are similar to each other (no CAP)

\*RAG2-like of *Henricia sp.* can not be classify easily in a family.



---

**Notes**

---

*Length: 1460* \*

*Length: 1023* \*

11083962.1\*)

E. spinulosus

**Table S21. RAG1/2-like copies in Echinaster spinulosus genomes.**

RAG1x-RAG2x like : Not phylogenetically assigned

**Genomics**

There is no WGS project

**Transcripts**

We find a significant transcript result for **RAG2x-like (Contig1\*)** and a small fragment (**GAVE01094595.1\***).

Also we find some transcript fragments for **RAG1x-like (GAVE01108867.1, GAVE01016803.1, GAVE01014984.1\* & GAVE01014984.1\*)**

| Species              | Transcript | RAG ID    | scaffold ID | Notes                                                                                                                                                                                                                                                                                                                                                                                                                                                                                                                                                                 |
|----------------------|------------|-----------|-------------|-----------------------------------------------------------------------------------------------------------------------------------------------------------------------------------------------------------------------------------------------------------------------------------------------------------------------------------------------------------------------------------------------------------------------------------------------------------------------------------------------------------------------------------------------------------------------|
| <i>E. spinulosus</i> | TRANSCRIPT | RAG2-like |             | <p><i>Other transcripts:</i><br/> Contig1_RAG2 : gi 637915705 gb GAVE01094586.1 +<br/> GAVE01094586.1 +<br/> gi 637915714 gb GAVE01094577.1 +<br/> is in gi 637915705 gb GAVE01094586.1 +<br/> gi 637915708 gb GAVE01094583.1 +<br/> gi 637915709 gb GAVE01094582.1 +<br/> gi 637915718 gb GAVE01094573.1 +<br/> is in gi 637915709 gb GAVE01094582.1 +<br/> gi 637915712 gb GAVE01094579.1 +<br/> is in gi 637915718 gb GAVE01094573.1 +<br/> gi 637915719 gb GAVE01094572.1 +<br/> is in gi 637915709 gb GAVE01094582.1 +<br/> gi 637915710 gb GAVE01094581.1 +</p> |

\*RAG2-like of E. spinulosus are similar from each other (no CAP)

\*RAG1-like of E. spinulosus. can not be classify easily in a family.

E. spinulosus

04389.1)

**Table S22. *RAG1/2-like* copies in *Peribolaster folliculatus* genomes.**

**Genomics**

There is no WGS project

**Transcripts**

We do not find significant transcript results.

*P. folliculatus*

Leptasterias sp.

**Table S23. RAG1/2-like copies in *Leptasterias sp. AR-2014* genomes.**

RAG1x : Not phylogenetically assigned

**Genomics**

There is no WGS project

**Transcripts**

We find significant transcript results for **RAG2B2-like (GAVC01001406.1)**

Transcript fragments for **RAG1x-like (Contig1)**

\*RAG2-like of *Leptasterias sp.* is likely to be part of the RAG2B2-like family.

|         |              |
|---------|--------------|
| Contig1 | GAVC0106630  |
|         | 6.1 +        |
|         | gi 638922403 |
|         | gb           |

Leptasterias sp.

P. ochraceus

**Table S24. *RAG1/2-like* copies in *Pisaster ochraceus* genomes.**

**Genomics**

There is no WGS project

**Transcripts**

*We do not find significant results (NS)*



*P. ochraceus*

M. glacialis

**Table S25. *RAG1/2-like* copies in *Marthasterias glacialis* genomes.**

**Genomics**

There is no WGS project

**Transcripts**

*We do not find significant results (NS)*

M. glacialis

A. rubens

**Table S26. *RAG1/2-like* copies in *Asterias rubens* genomes.**

**Genomics**

There is no WGS project

**Transcripts**

*We do not find significant results (NS)*

A. rubens

A. forbesi

**Table S27. RAG1/2-like copies in *Asterias forbesi* genomes.**

 Orange color = complete RAG-like protein

**Genomics**

There is no WGS project

**Transcripts**

| Species           | Transcript | RAG ID       | scaffold ID                                                                                      | RAG1-like |     | RAG2-like |     |
|-------------------|------------|--------------|--------------------------------------------------------------------------------------------------|-----------|-----|-----------|-----|
|                   |            |              |                                                                                                  | Start     | End | Start     | End |
| <i>A. forbesi</i> | TRANSCRIPT | RAG1B2-like* | 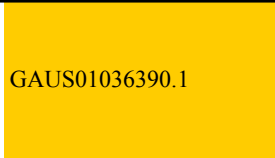 GAUS01036390.1 | 2643      | 115 |           |     |
| <i>A. forbesi</i> | TRANSCRIPT | RAG1B2-like* | GAUS01036391.1                                                                                   | 2040      | 118 |           |     |
| <i>A. forbesi</i> | TRANSCRIPT | RAG2B2-like  | GAUS01036395.1                                                                                   |           |     | 1072      | 230 |

\*RAG1-like of *A. forbesi*. is likely to be part of the RAG1B2-like family.

\*RAG2-like of *A. forbesi*. is likely to be part of the RAG2B2-like family.

---

**Notes**

---

*Length: 2943*

*mRNA*  
*Traduction*  
*Reverse frame*  
*1. Position:*  
*300-2832*

*Length: 5072*

*Length: 1755*

A. amurensis

**Table S28. *RAG1/2-like* copies in *Asterias amurensis* genomes.**

**Genomics**

There is no WGS project

**Transcripts**

We find transcript fragments in **RAG2B2-like (GAVL01057092.1)** and **RAG1-like (GAVL01012549.1\_not significant [**



A. amurensis

NSD)

L. clathrata

**Table S29. *RAG1/2-like* copies in *Luidia clathrata* genomes.**

**Genomics**

There is no WGS project

**Transcripts**

*We do not find significant results (NS)*

L. clathrata

A. planci

**Table S30. *RAG1/2-like* copies in *Acanthaster planci* genomes.**

**Genomics**

*We do not find significant results (NS)*

**Transcripts**

*We do not find significant results (NS)*

A. planci

P. miniata

**Table S31. RAG1/2-like copies in *Patiria miniata* genomes.**

Orange color = complete RAG-like protein

| Genomics                                                              |             |                | RAG1-like |      | RAG2-like |      |
|-----------------------------------------------------------------------|-------------|----------------|-----------|------|-----------|------|
| Species                                                               | RAG ID      | scaffold ID    | Start     | End  | Start     | End  |
| There are included those with a Query cover >20%. Smallest Ident. 34% |             |                |           |      |           |      |
| <i>P. miniata</i>                                                     | RAG1B2-like | JH771625.1     | 459       | 2171 |           |      |
| <i>P. miniata</i>                                                     | RAG1B2-like | JH769343.1     | 3828      | 5535 |           |      |
| <i>P. miniata</i>                                                     | RAG1B2-like | AKZP01053171.1 | 3445      | 4824 |           |      |
| <i>P. miniata</i>                                                     | RAG1B2-like | JH769405.1     | 5927      | 4209 |           |      |
| <i>P. miniata</i>                                                     | RAG1B2-like | JH780581.1     | 4440      | 3176 |           |      |
| <i>P. miniata</i>                                                     | RAG1-like   | JH775991.1     | 1186      | 839  |           |      |
| There are included those with a Query cover >20%.                     |             |                |           |      |           |      |
| <i>P. miniata</i>                                                     | RAG2B2-like | JH772703.1     |           |      | 1031      | 3195 |

**Transcripts - NR database**

We can find a short RAG1-like transcripts (GAWB01010448.1 – partial and short transcript of *Jl*)

P. miniata

| Structure              | TSD Sequence                 |
|------------------------|------------------------------|
| TSD-5TIR-RAG1-3TIR-TSD | >Pmi_JH771625<br>---TTCAGcaa |
| TSD-5TIR-RAG1          | >Pmi_JH769343<br>gagTTTAG--- |
| RAG1-3TIR              |                              |

*4771625.1 [Query 100% & Ident 96%] or AKZP01019636.1 [Query 100% & Ident 80%].*

P. miniata

| TIR Sequence                                                                                     | Notes                                                                                                                                                                                                                         |
|--------------------------------------------------------------------------------------------------|-------------------------------------------------------------------------------------------------------------------------------------------------------------------------------------------------------------------------------|
| CACAGCGAAAAATGCCTTACAIGAATGACA----<br>CGGAGCGGCCTTGAGAGGGCGGCACAGCT<br>>Pmi_JH771625_3_71_bp     | Alternative name AKZP01053172.1 in the NCBI database                                                                                                                                                                          |
| CACAGCGAAAAATTCCCCATTGGTAGTGTA----<br>>Pmi_JH769343_5_71_bp                                      |                                                                                                                                                                                                                               |
| CACAGTGAAAAATGCCTTANATAAATGGCA----<br>CGGAGCGGCCGGTAGAGGGCGGCACAGCC                              | Alternative name AKZP01019636.1 in the NCBI database<br>Alternative name JH771625.1 in Echinobase. Pseudogene<br>Alternative name AKZP01020859.1 in the NCBI database<br>Alternative name AKZP01114579.1 in the NCBI database |
| >Pmi_AKZP01172991_3_71_bp<br>CACAGCGAAAAATTCCCCATTGGCCGTGTAA----<br>CACGGATGGGAATGGGGCGTGGGCGACA | Alternative name AKZP01090827.1 in the NCBI database                                                                                                                                                                          |



P. miniata

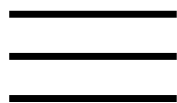

se.

ase. Pseudogene (stop codon)

ne (stop codon).

se. Pseudogene (stop codon)

se.

se

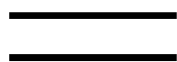

P. pectinifera

**Table S10. *RAG1/2* copies in *Ophiocoma echinata* genomes.**

We find transcript fragments in RAG2-like (GAUQ01068411.1 ) and RAG1-like (GAUQ01034189.1, GAUQ01007173.1, GAUQ0

**Table S32. *RAG1/2-like* copies in *Patiria pectinifera* genomes.**

**Genomics**

There is no WGS project

**Transcripts**

We find transcript fragments in **RAG1B1-like (GAVT01102981.1\*)** and **RAG2B2-like (Contig2 & Contig1)**

\*RAG1-like of P. pectinifera is part of the RAG1B1-like family.

Note:

Contig1\_RAG2-like= gb|GAVT01098600.1|-  
gi|638542668|gb|GAVK01108580.1|+ is in gb|GAVT01098600.1|-

Contig2\_RAG2-like= gb|GAVT01012421.1|+  
gi|638541702|gb|GAVK01109546.1|+

*P. pectinifera*

(1058697.1 & GAUQ01058696.1)

*P. pectinifera*
